# Supplementary material for: Clinical and laboratory characteristics in juvenile-onset systemic lupus erythematosus across age groups
Source: PubMed Central journal article supplement (PMC7528537; doi:10.1177/0961203320909156), 2020-03-31
Supplement: LUP909156_Supplemental_Material.pdf [file LUP909156_Supplemental_Material.pdf]

**Supplement table 1 – Ethnicity of participants**

| <b>Ethnicity</b>                       | <b>Pre-pubertal<br/>disease-onset<br/>(n=43)</b> | <b>Peri-pubertal<br/>disease-onset<br/>(n=240)</b> | <b>Adolescence<br/>(n=135)</b>   | <b>P value</b> |
|----------------------------------------|--------------------------------------------------|----------------------------------------------------|----------------------------------|----------------|
| British or Irish                       | 19/43 (44.2%)<br>[29.3%, 59.0%]                  | 104/240 (43.3%)<br>[37.0%, 49.6%]                  | 77/135 (57.0%)<br>[48.7%, 65.4%] | 0.100          |
| Asian                                  | 13/43 (30.2%)<br>[16.5%, 44.0%]                  | 73/240 (30.4%)<br>[24.6%, 36.2%]                   | 41/135 (30.4%)<br>[22.6%, 38.1%] |                |
| African/Caribbean                      | 8/43 (18.6%)<br>[7.0%, 30.2%]                    | 45/240 (18.8%)<br>[13.8%, 23.7%]                   | 14/135 (10.4%)<br>[5.2%, 15.5%]  |                |
| Other Caucasian<br>origin              | 1/43 (2.3%)<br>[-2.2%, 6.8%]                     | 7/240 (2.9%)<br>[0.8%, 5.0%]                       | 2/135 (1.5%)<br>[-0.6%, 3.5%]    |                |
| Any other<br>mixed/black<br>background | 0/43 (0%)<br>[0%, 0%]                            | 7/240 (2.9%)<br>[0.8%, 5.0%]                       | 0/135 (0%)<br>[0%, 0%]           |                |
| Ethnicity not<br>stated                | 2/43 (4.7%) [-1.6%,<br>10.9%]                    | 4/240 (1.67%)<br>[0.0%, 3.3%]                      | 1/135 (0.7%)<br>[-0.7%, 2.2%]    |                |

Ethnicities were compared between age groups using the Chi Square test of independence. For each ethnic group, the total number of patients is provided along with the percentage (in curved brackets), and 95% confidence intervals for the percentage [in square brackets].

**Supplement table 2: Distribution of ethnicities across age groups.**

| <b>Age groups</b>            | <b>White Caucasian</b> | <b>Asian</b> | <b>Afro-Caribbean</b> | <b>No of individuals</b> | <b>P value</b> |
|------------------------------|------------------------|--------------|-----------------------|--------------------------|----------------|
| <b>≤7</b>                    | 20 (48.8%)             | 13 (31.7%)   | 8 (19.5%)             | 41                       |                |
| <b>8 to 13</b>               | 111 (47.0%)            | 74 (31.4%)   | 51 (21.6%)            | 236                      |                |
| <b>≥14</b>                   | 79 (59.0%)             | 41 (30.6%)   | 14 (10.4%)            | 134                      | 0.072          |
| <b>No of<br/>individuals</b> | 210                    | 127          | 74                    | 411                      |                |

Differences in ethnical compositions among sub-cohorts was tested using Chi square tests.
